# Supplementary material for: A nanocluster beacon based on the template transformation of DNA-templated silver nanoclusters
Source: Royal Society of Chemistry journal article supplement (doi:10.1039/c5cc09138a), 2015-11-30
Supplement: c5cc09138a1.pdf [file c5cc09138a1.pdf]

## Supporting Information

### A Nanocluster beacon based on the template transformation of DNA-templated silver nanoclusters

Ye Teng, ‡<sup>ab</sup> Xiaofang Jia, ‡<sup>a</sup> Shan Zhang, <sup>ab</sup> Jinbo Zhu <sup>ab</sup> and Erkang Wang\*<sup>a</sup>

<sup>a</sup>*State Key Laboratory of Electroanalytical Chemistry, Changchun Institute of Applied  
Chemistry, Chinese Academy of Sciences, Changchun, Jilin, 130022, China.*

<sup>b</sup>*University of the Chinese Academy of Sciences, Beijing, 100049, China.*

Email: [ekwang@ciac.ac.cn](mailto:ekwang@ciac.ac.cn)

Table S1. Sequences utilized for DNA-Ag NCs synthesis and template transformation.

| Name        | Sequences (5' to 3')                  |
|-------------|---------------------------------------|
| template a  | CCCTTAATCCCC                          |
| template b  | CCCCCCCCCCCCC                         |
| template c  | CCCACCCACCCGCCCA                      |
| s-a5'       | CCCTTAATCCCCAATCATCTCTTCC             |
| s-b3'       | GGAAGAGATGATTCCCCCCCCCCCCC            |
| s-b5'       | CCCCCCCCCCCCCGGAAGAGATGATT            |
| s-c5'       | CCCACCCACCCGCCCAGGAAGAGATGATT         |
| cs          | GGAAGAGATGATT                         |
| n-b3'       | TGAGTGATGTAGATGTCCCCCCCCCCCCC         |
| A-b3'       | AAAAAAAAAAAAAAAAACCCCCCCCCCCC         |
| A-b5'       | CCCCCCCCCCCCCAAAAAAAAAAAAAAAAAA       |
| s-a3'       | AATCATCTCTTCCCCCTTAATCCCC             |
| Linker      | TTTTTTTTTTTTTTTTTGGGAAGAGATGATT       |
| Linker-6    | TTATCGTTTTTTTTTTTTTTTTTGGGAAGAGATGATT |
| Linker-6-co | AATCATCTCTTCCAAAAAAAAAAAAAAAAACGATAA  |
| probe a-HBB | CCCTTAATCCCCCTTCTCCTCAGG              |
| probe b-HBB | AGTCAGGTGCACCCCCCCCCCCCCC             |
| target-HBB  | GTGCACCTGACTCCTGAGGAGAAG              |
| M1          | GTGCACCTGACTCCTGTGGAGAAG              |
| M2          | GTGCACCTGACTCCTGTGGATAAG              |
| M3          | GTGCACCTGACTCCTGTGTATAAG              |
| M4          | GTGCACCTGACTCCTGTGTATAGG              |
| N           | GCTAGAGATTTTCCACACTGACT               |

## Experiment Section

### 1. Chemicals and materials

DNA sequences used in this work were purchased from Shanghai Sangon Biotechnology Co. Ltd. (Shanghai, China) and directly used without further purification. Sequences were listed in Table S1. All the DNA samples were prepared with sodium phosphate buffer (PB, 200 mM, pH 7.4). Sodium borohydride (98%) was bought from Sigma-Aldrich Co. (USA). Silver nitrate and other salts were obtained from Beijing Chemical Co. (China). The double-distilled water for solution preparation was purified by a Milli-Q system (Millipore, Bedford, MA, USA).

### 2. Preparation of DNA-Ag NCs

DNA-Ag NCs were synthesized according to previous references. Briefly, 10  $\mu$ M DNA were mixed with 60  $\mu$ M AgNO<sub>3</sub>. After incubating at room temperature for 10 min, 60  $\mu$ M fresh NaBH<sub>4</sub> were added with vigorously shaking for 1 min. The molar ratio of DNA:Ag<sup>+</sup>:NaBH<sub>4</sub> was 1:6:6. The solution was kept in dark at room temperature for 4 h to form Ag NCs.

### **3. DNA detection**

For DNA detection, the prepared dark DNA-Ag NCs were diluted to 0.5  $\mu$ M for hybridizations. After adding C<sub>12</sub> template and target DNA, samples were incubated at room temperature for 1 h before characterizations.

### **4. Characterizations**

UV-visible absorption spectra were recorded on an Agilent Cary 60 UV-Vis spectrophotometer at room temperature. The fluorescence spectra were obtained on an Agilent Cary Eclipse fluorescence spectrophotometer with the slit widths of 20 nm for both excitation and emission. The luminescence decay curves were performed by a FLS920 spectrofluorometer.

### **5. Native polyacrylamide gel electrophoresis (PAGE)**

The prepared DNA solutions were diluted with 6  $\times$  loading buffer (TEK buffer, pH 8.0, 50% glycerol, 0.25% bromophenol blue), then analyzed in 15% native polyacrylamide gel. The electrophoresis was conducted in 1  $\times$  TBE (pH 8.0) at 110V constant voltage for 1 hour. After staining with ethidium bromide, the gels were scanned by a UV transilluminator.

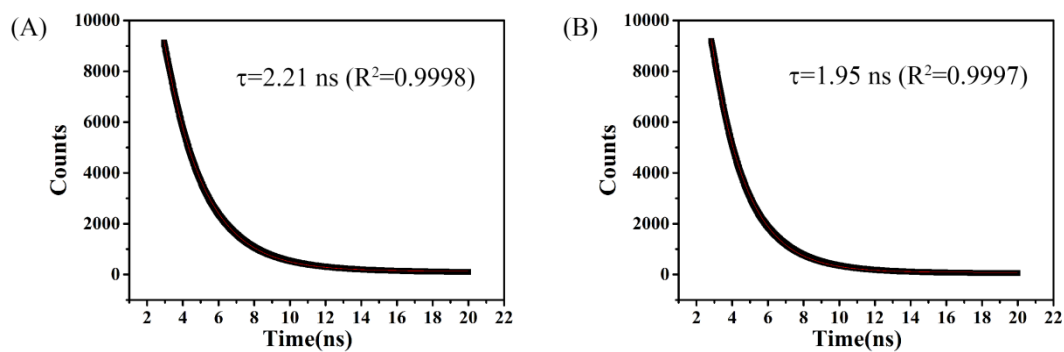

**Fig. S1.** The fluorescence decay of (A) s-a5'-Ag NCs and (B) s-a5'-Ag NCs + s-b5' and their fitting lines with a monoexponential function.

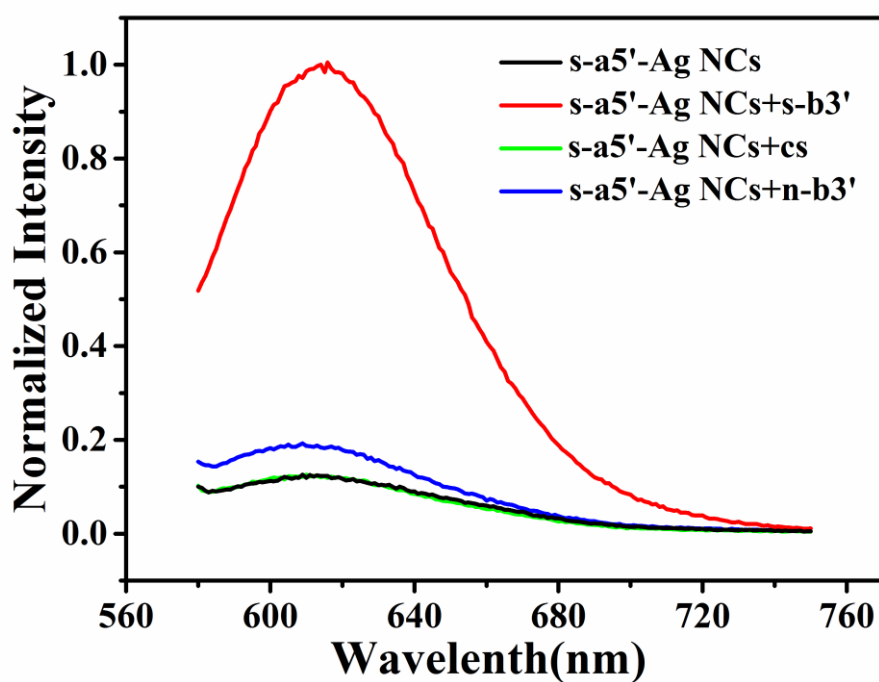

**Fig.S2.** The fluorescence spectra of s-a5'-Ag NCs, s-a5'-Ag NCs+s-b3', s-a5'-Ag NCs +cs and s-a5'-Ag NCs+n-b3'.

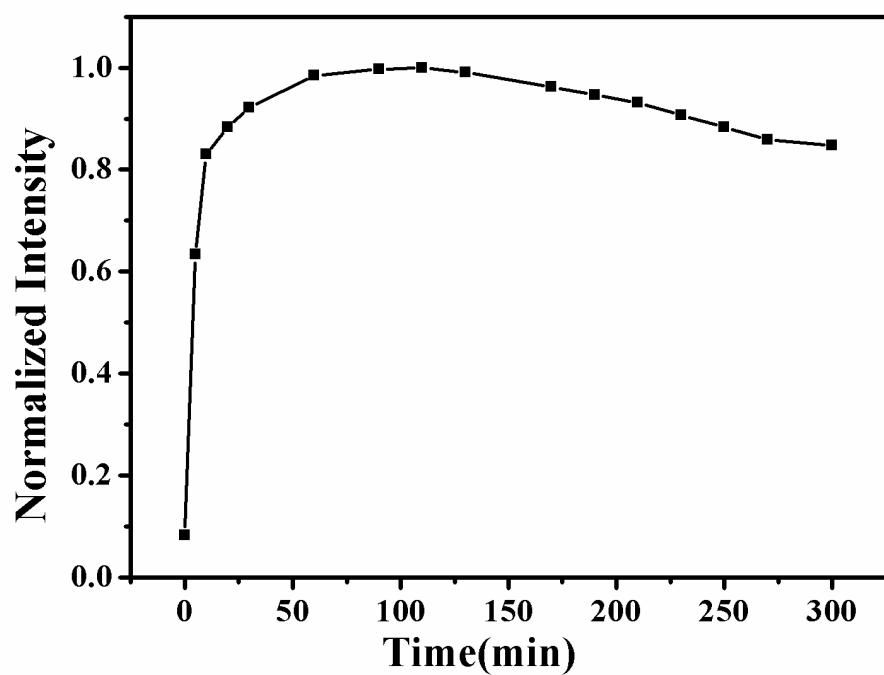

**Fig. S3.** The fluorescence intensity of s-a5'-Ag NCs with reaction time after the addition of A-b3' and Linker.

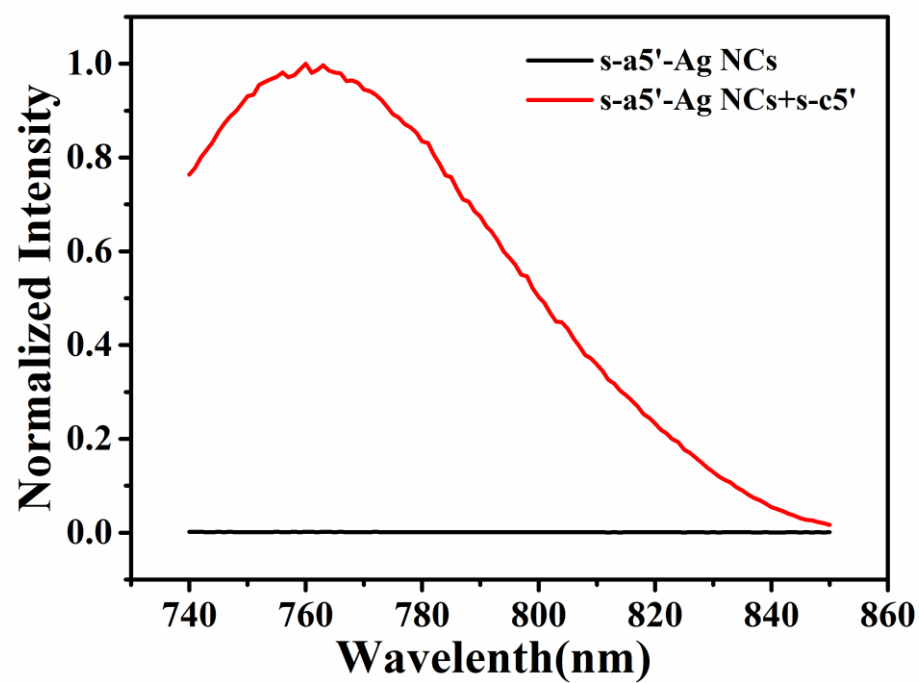

**Fig. S4.** The fluorescence spectra of s-a5'-Ag NCs and s-a5'-Ag NCs + s-c5'.

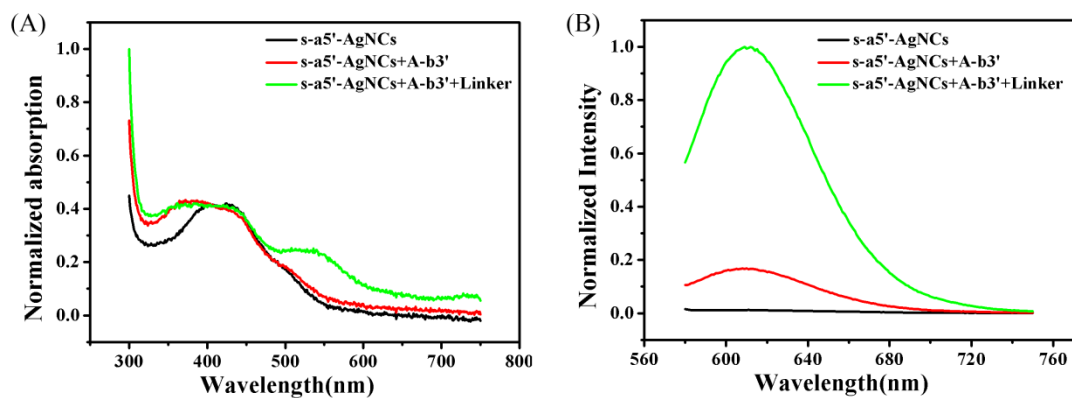

**Fig. S5.** (A)The UV-Vis spectra of s-a5'-Ag NCs, s-a5'-Ag NCs+A-b3' and s-a5'-Ag NCs+A-b3'+Linker. (B)The fluorescence spectra of s-a5'-Ag NCs, s-a5'-Ag NCs+A-b3' and s-a5'-Ag NCs+A-b3'+Linker.

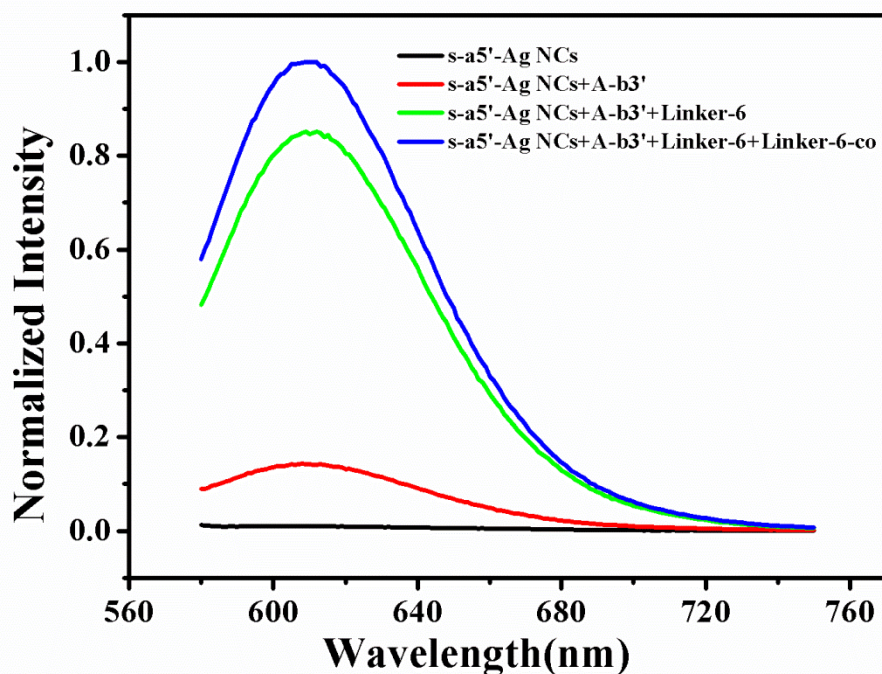

**Fig. S6.** The fluorescence intensity of s-a5'-Ag NCs, s-a5'-Ag NCs+A-b3', s-a5'-Ag NCs+A-b3'+Linker-6 and s-a5'-Ag NCs+A-b3'+Linker-6+Linker-6-co.

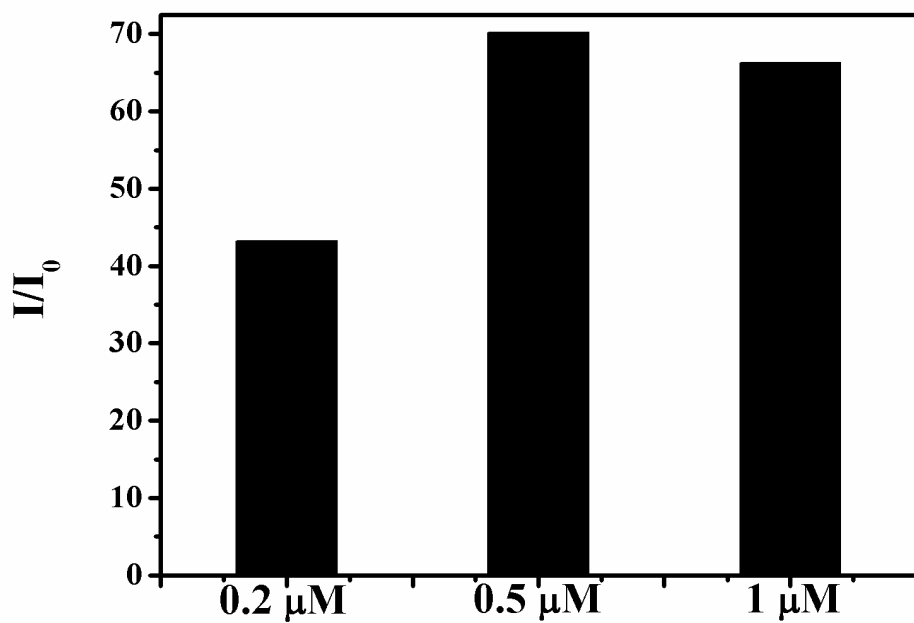

**Fig. S7.** The optimization of DNA and Ag NCs concentration utilizing s-a5'-Ag NCs, A-b3' and Linker.  $I_0$  was the fluorescence intensity of dark Ag NCs.  $I$  was the fluorescence intensity of dark s-a5'-Ag NCs reacting 1 h after the addition of Linker and A-b3'.
